# Supplementary material for: Aedes aegyptiuses RNA interference in defense against Sindbis virus infection
Source: Springer Nature journal article supplement (doi:10.1186/1471-2180-8-47), 2008-03-17
Supplement: Additional file 4 [file 1471-2180-8-47-s4.pdf]

## Campbell and others, BMC Microbiology

Additional File 4 Primers

|         | target         | Forward Primer                   | Reverse primer                    |
|---------|----------------|----------------------------------|-----------------------------------|
| qRT-PCR | <i>ACT1</i>    | nt301- GAGCACCCAGTTCTGCTGAC      | nt446- GTACGACCGGAGGCGTACAG       |
|         | <i>TSN</i>     | nt2631- CACGACCCGCCTAGCCATGCTT   | nt2682-GTACGGTTTGTCCGAAATGAAG     |
|         | <i>Dcr2(3)</i> | nt4546- GAATTCCTCGGCGATGCGGTATTA | nt4724- GATGCCGACTCTGCCAGGATGT    |
|         | <i>Ago2</i>    | nt2558- GACACCATGCCCGTTTCTTC     | nt2680- CCAGGAAGAATTGATACTGGTT    |
|         | <i>Ago2(4)</i> | nt2045- GGCTGCTCACCCAATGTATCAAGA | nt2149- AACCGTTCGTTTTGGCGTTGAT    |
|         | TR339          | nt4495- TAGACAGAACTGACGCGGACGT   | nt4635-TCCATACTAACTCATCGTTCGATCTC |
|         | MRE-16         | nt4494- TGGACAGAACTGACGCAGAC     | nt4699- CGAGTAGAGTTTGCCCTTCG      |
| dsRNA   | <i>Ago2</i> *  | nt2383- CAGTTCAAGCAGACGAACCA     | nt2881- TGATGTAGACGCGTCCTCTG      |
|         | <i>Dcr2</i> *  | nt4006-CCACCTCTAGCAACGGTTCCGAAGA | nt4504- CGCATGGGTGAGTGCTTGTAGGAG  |
|         | <i>TSN</i> *   | nt2713-CTGCCAACCGACGAAGAGGACA    | nt3089- TGAAGGGCAGGTGTGAACATCG    |
|         | TR339-nsP3*    | nt4549- AAAGAATCGACGCGGCAC       | nt5032- AGGACTACTTTTCGTGCACTG     |
|         | $\beta$ -GAL*  | GGTCGCCAGCGGCACCGCGCCTTC         | GCCGGTAGCCAGCGCGGATCATCGG         |

|       |            |                                        |                                        |
|-------|------------|----------------------------------------|----------------------------------------|
| Probe | MRE16-eGFP | * nt9976-<br>TATGATCGTCTGAAGGAAACATCAG | nt12182- GCA AAC AGC CAG CTC CAT GAT G |
|       |            | *nt4976-<br>ACTTCCGAAGCACAAAATTAAGAAC  | nt9083- GGGTGTTTCGCTGGTGTAGGAGA        |
|       |            | *nt1- GATTGGCGGCGTAGTACACACTAT         | nt4899- ACATACACAAACAGGGAAGCGTCT       |
|       |            | nt9976- TATGATCGTCTGAAGGAAACATCAG      | *nt12182- GCA AACAGCCAGCTCCATGATG      |
|       |            | nt1- GATTGGCGGCGTAGTACACACTAT          | *nt5000- GTTCTTAATTTTGTGCTTCGGAAGT     |
|       |            | nt4976- ACTTCCGAAGCACAAAATTAAGAAC      | *nt10000- CTGATGTTTCCTTCAGACGATCATA    |

**Additional File 4. Primers used for qRT-PCR and dsRNA injections.**

Primer nucleotide (nt) position numbers correspond to the published sequence: *Act1*, [Genbank: AAU20287]; *TSN*, [Genbank: AAEL000293]; *Dcr2*, [Genbank: AY713296]; *Ago2*, [Genbank: SUPP\_AEDES003395]; TR339, [Genbank: NC\_001547]; MRE16, [Genbank: AF492770]. *Ago2* primers were used to analyze transcript levels. *Ago2(4)* primers were used to analyze transcript levels following *Ago2* dsRNA injection. “\*” indicates placement of 5’ T7 promoter extension on dsRNA and viral probe primers (TAATACGACTCACTATAGG).
